# Supplementary material for: Zonal asymmetry of the Quasi Biennial Oscillation
Source: Research Square preprint supplement (doi:10.21203/rs.3.rs-7877638/v1), 2025-10-30
Supplement: Supplementary file 1 [file c37ccb6ba676974aafdff735.pdf]

## Supplementary Material

### Zonal asymmetry of the Quasi Biennial Oscillation

Ryo Hayakawa<sup>1</sup> and Yoshio Kawatani<sup>2</sup>

<sup>1</sup>*Graduate school of Environmental Science, Hokkaido University, Sapporo, Japan*

<sup>2</sup>*Faculty of Environmental Earth Science, Hokkaido University, Sapporo, Japan*

Corresponding author: Yoshio Kawatani, N10 W5 Kita-ku, Sapporo, 060-0810, Japan.

Email: kawatani@ees.hokudai.ac.jp

Supplementary material provided with this paper contains four supplementary figures (Figs. S1–S4), three supplementary tables (Tables S1–S3), and a description of the IGRA data processing procedure.

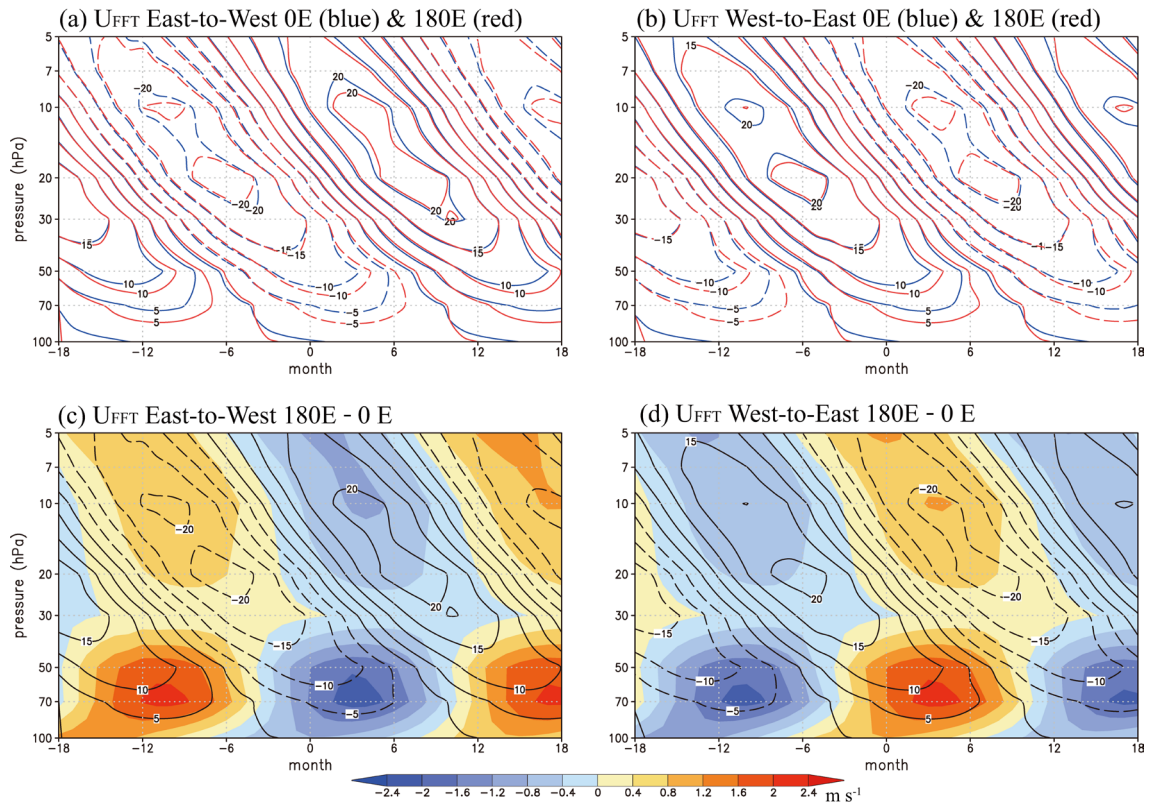

**Figure S1.** Same as Figure 1 but using  $U_{FFT}$ .

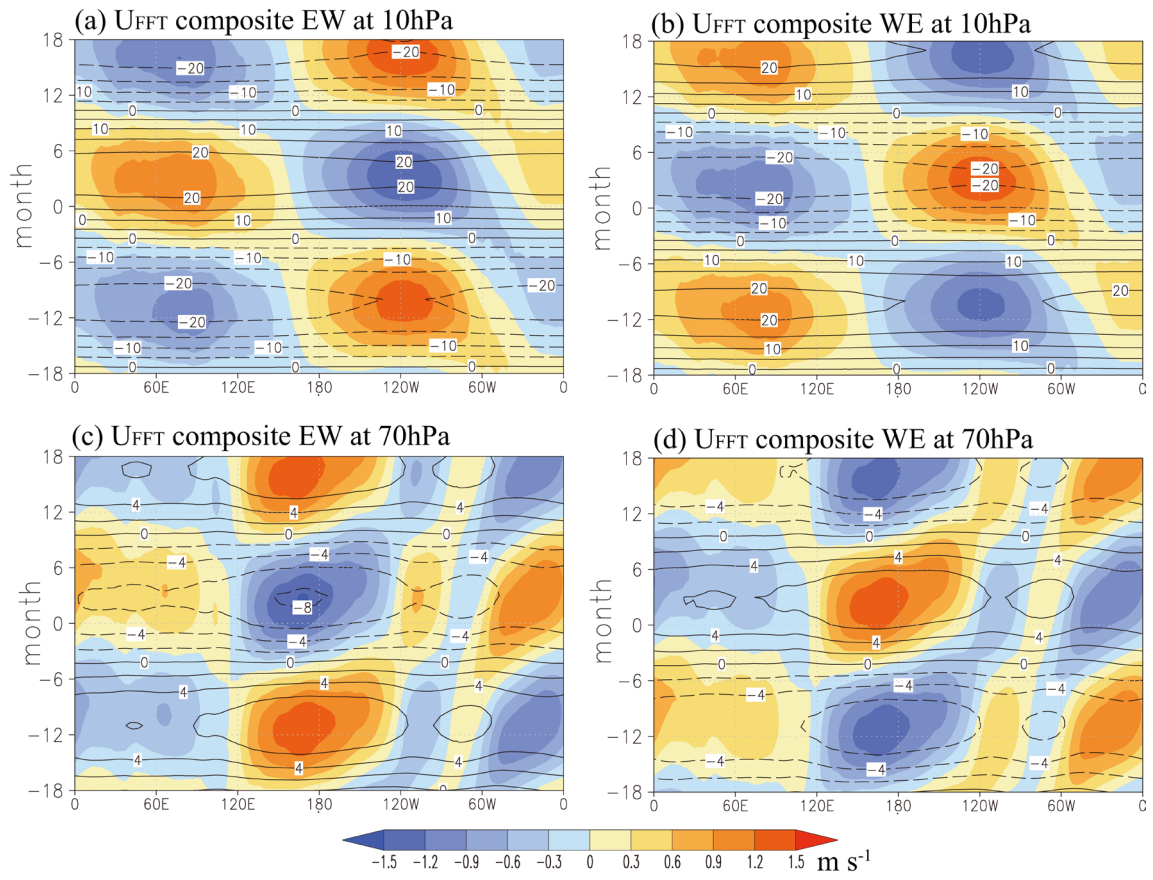

1

2 **Figure S2.** Same as Figure 3 but using  $U_{FFT}$ .

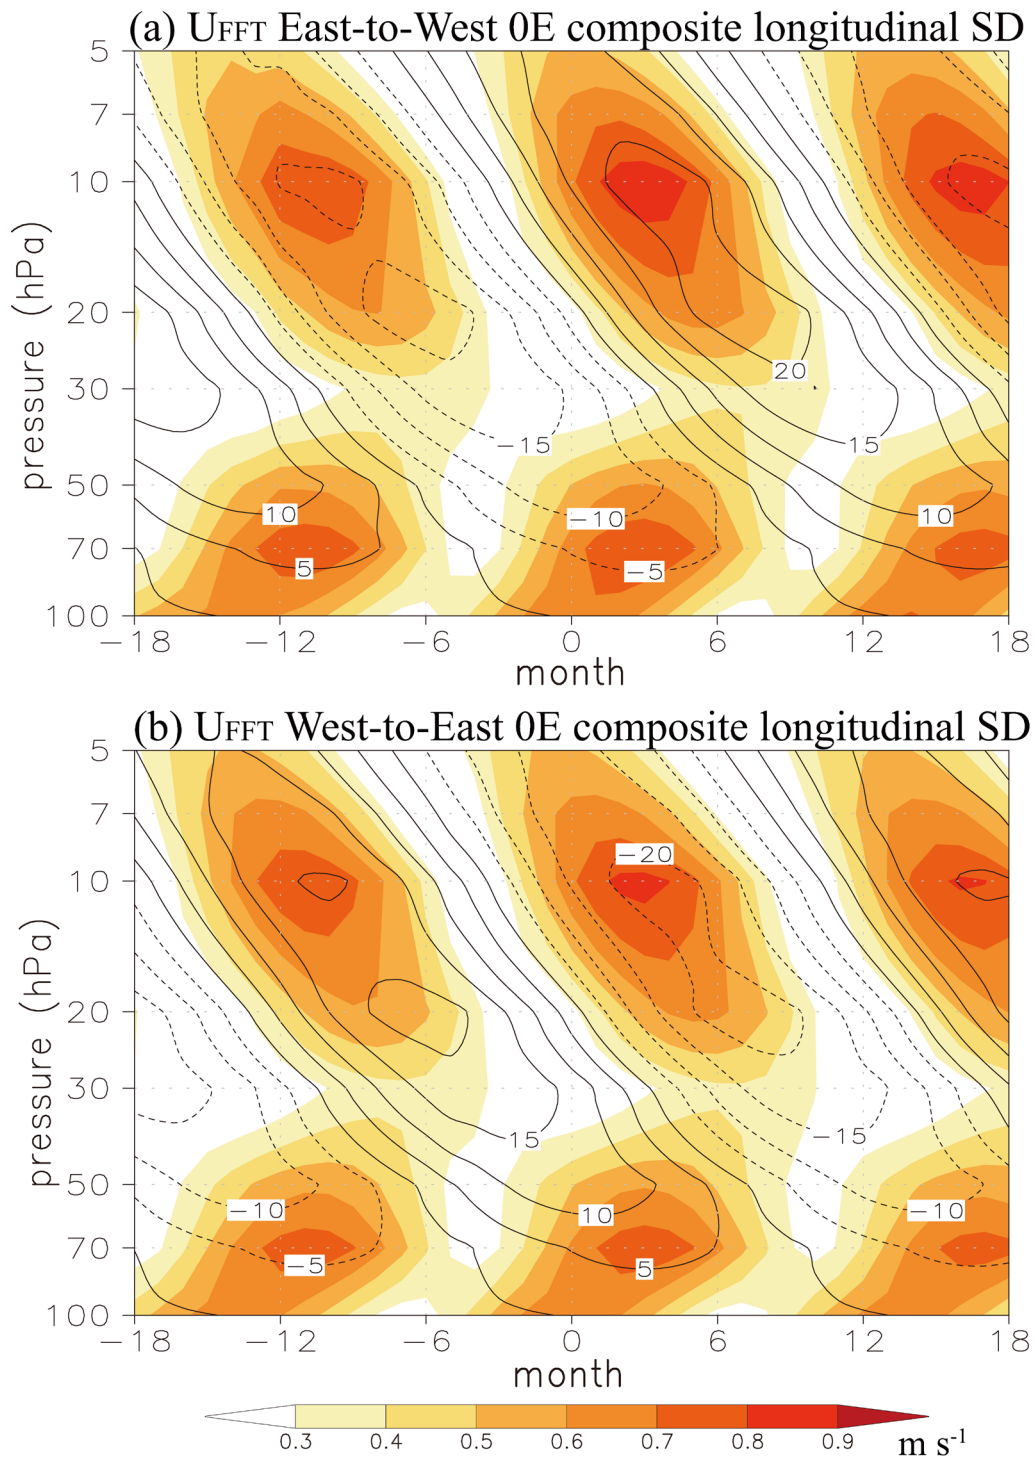

**Figure S3.** Same as Figure 4 but using  $U_{FFT}$ .

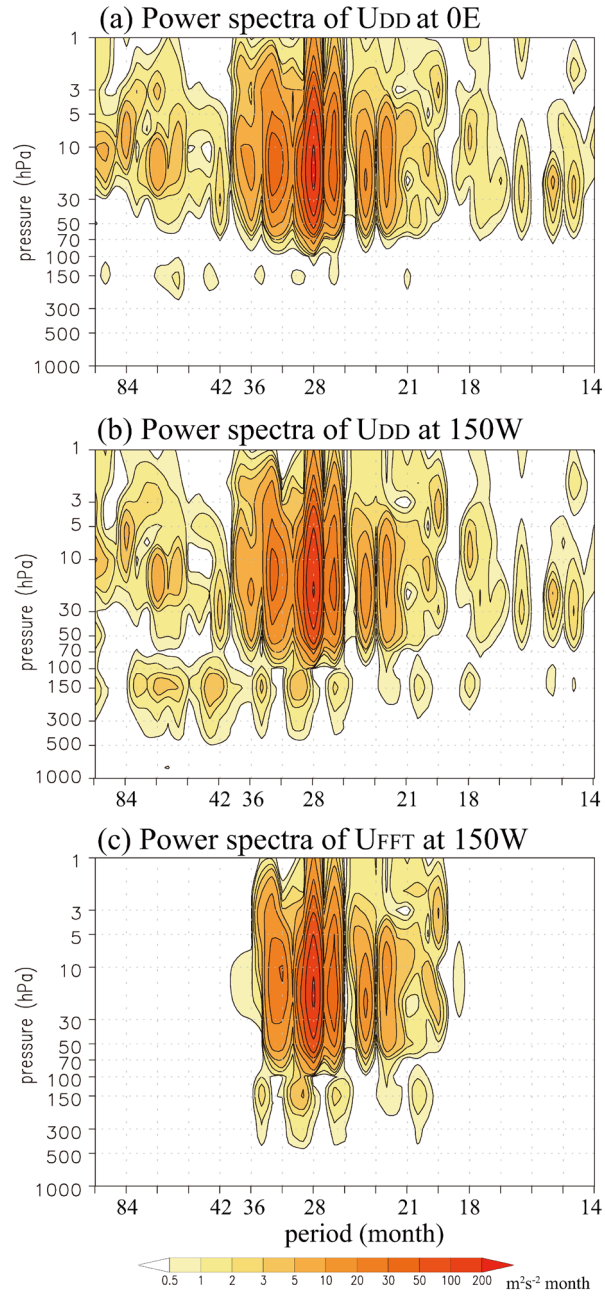

**Figure S4.** Power spectra of (a)  $U_{DD}$  at  $0^\circ\text{E}$ , (b)  $U_{DD}$  at  $150^\circ\text{W}$ , and (c)  $U_{FFT}$  at  $150^\circ\text{W}$ .

The vertical axis shows pressure (hPa) and the horizontal axis shows period (months).

Colors indicate spectral power ( $\text{m}^2 \text{s}^{-2} \text{month}$ ), with color intervals as in the color

bar.

| E to W DD | Month    | W to E DD | Month    |
|-----------|----------|-----------|----------|
| 1         | Apr 1959 | 1         | Mar 1958 |
| 2         | Dec 1960 | 2         | Apr 1960 |
| 3         | May 1963 | 3         | Jan 1962 |
| 4         | Jan 1966 | 4         | Jun 1964 |
| 5         | Sep 1968 | 5         | Apr 1967 |
| 6         | Oct 1970 | 6         | Nov 1969 |
| 7         | Nov 1972 | 7         | Feb 1972 |
| 8         | Jan 1975 | 8         | Oct 1973 |
| 9         | Jul 1977 | 9         | May 1976 |
| 10        | Dec 1979 | 10        | Sep 1978 |
| 11        | May 1982 | 11        | Mar 1981 |
| 12        | Sep 1984 | 12        | May 1983 |
| 13        | Jun 1987 | 13        | Feb 1986 |
| 14        | Nov 1989 | 14        | Apr 1988 |
| 15        | May 1992 | 15        | Mar 1991 |
| 16        | Aug 1994 | 16        | Jun 1993 |
| 17        | Oct 1996 | 17        | Sep 1995 |
| 18        | Sep 1998 | 18        | Nov 1997 |
| 19        | Aug 2001 | 19        | Nov 1999 |
| 20        | Oct 2003 | 20        | Nov 2002 |
| 21        | Dec 2005 | 21        | Oct 2004 |
| 22        | Nov 2007 | 22        | Dec 2006 |
| 23        | May 2010 | 23        | Feb 2009 |
| 24        | Sep 2012 | 24        | May 2011 |
| 25        | Mar 2015 | 25        | Mar 2014 |

**Table S1.** Dates of easterly-to-westerly and westerly-to-easterly transitions in the deseasonalized and smoothed zonal-mean  $U_{DD}$  from JRA-55 reanalysis data.

| E to W FFT | Month    | W to E FFT | Month    |
|------------|----------|------------|----------|
| 1          | Dec 1958 | 1          | Apr 1958 |
| 2          | Jan 1961 | 2          | Jan 1960 |
| 3          | May 1963 | 3          | Mar 1962 |
| 4          | Feb 1966 | 4          | Oct 1964 |
| 5          | Aug 1968 | 5          | May 1967 |
| 6          | Nov 1970 | 6          | Oct 1969 |
| 7          | Nov 1972 | 7          | Nov 1971 |
| 8          | Feb 1975 | 8          | Dec 1973 |
| 9          | Jun 1977 | 9          | Apr 1976 |
| 10         | Nov 1979 | 10         | Aug 1978 |
| 11         | May 1982 | 11         | Feb 1981 |
| 12         | Sep 1984 | 12         | Jul 1983 |
| 13         | May 1987 | 13         | Feb 1986 |
| 14         | Nov 1989 | 14         | Jul 1988 |
| 15         | Apr 1992 | 15         | Mar 1991 |
| 16         | Aug 1994 | 16         | Jun 1993 |
| 17         | Oct 1996 | 17         | Sep 1995 |
| 18         | Nov 1998 | 18         | Oct 1997 |
| 19         | Jul 2001 | 19         | Feb 2000 |
| 20         | Oct 2003 | 20         | Sep 2002 |
| 21         | Nov 2005 | 21         | Nov 2004 |
| 22         | Dec 2007 | 22         | Dec 2006 |
| 23         | Apr 2010 | 23         | Feb 2009 |
| 24         | Sep 2012 | 24         | Jun 2011 |
| 25         | Mar 2015 | 25         | Dec 2013 |

1

2 **Table S2.** Same as Table S1, but for  $U_{FFT}$ .

| E to W FUB/KIT | Month    |
|----------------|----------|
| 1              | Feb 1959 |
| 2              | Sep 1960 |
| 3              | May 1963 |
| 4              | Dec 1965 |
| 5              | Jul 1968 |
| 6              | Oct 1970 |
| 7              | Oct 1972 |
| 8              | Nov 1974 |
| 9              | May 1977 |
| 10             | Oct 1979 |
| 11             | May 1982 |
| 12             | Aug 1984 |
| 13             | May 1987 |
| 14             | Nov 1989 |
| 15             | Apr 1992 |
| 16             | Aug 1994 |
| 17             | Oct 1996 |
| 18             | Aug 1998 |
| 19             | Jul 2001 |
| 20             | Sep 2003 |
| 21             | Nov 2005 |
| 22             | Nov 2007 |
| 23             | Jun 2010 |
| 24             | Aug 2012 |
| 25             | Mar 2015 |

**Table S3.** Dates of easterly-to-westerly transitions in the deseasonalized and smoothed

$U_{DD}$  from FUB/KIT radiosonde data.



## **Description of IGRA data processing**

Monthly mean zonal wind data at 70 hPa were obtained from stations located within 10° latitude of the equator, using the Integrated Global Radiosonde Archive (IGRA), version 2.2 (NOAA NCEI; <https://www.ncei.noaa.gov/products/weather-balloon/integrated-global-radiosonde-archive>). For each station, the 00 and 12 UTC time series were processed independently. A centered five-month running mean was applied to each series to interpolate isolated missing months. When both 00 and 12 UTC observations were available in a given month, their average was used as the monthly value; if only one observation was available, that value was used. Months with no available data were left missing.

QBO amplitudes were calculated from the resulting continuous monthly series, but only for QBO cycles with complete monthly data; incomplete cycles were assigned missing. The QBO cycle was defined using deseasonalized and smoothed 20 hPa zonal wind data from the FUB/KIT dataset (Naujokat, 1986), maintained by the Freie Universität Berlin (FUB) and the Karlsruhe Institute of Technology (KIT). Months of transition from easterly-to-westerly winds were identified (Table S3). Each interval between two successive easterly-to-westerly transitions was treated as one QBO cycle. To examine the climatological QBO amplitude at each station, only stations with at least eight complete cycles during the analysis period (1958–2015; 24 cycles in total) were included. This threshold corresponds to a minimum of about 30% coverage. A total of 27 stations within 10°S–10°N met this criterion.

The QBO amplitude exhibits a maximum over the equator, with a meridional half-width of approximately 12° (Baldwin et al., 2001). To examine longitudinal variations in the observed QBO amplitude, an equatorial adjustment was applied. The meridional

1 structure of the climatological zonal-mean QBO amplitude was derived from JRA-55 data  
2 for 1958–2015. Each station’s amplitude was scaled to the equator by applying a factor  
3 that converts the typical amplitude at the station’s latitude to the typical equatorial  
4 amplitude. This latitudinal adjustment enabled fair comparisons of amplitudes across  
5 stations located at different latitudes within the equatorial band.
